# Supplementary material for: Genomic and transcriptomic analysis of a library of small cell lung cancer patient-derived xenografts
Source: PubMed Central journal article supplement (PMC9018685; doi:10.1038/s41467-022-29794-4), 2022-04-19
Supplement: 41467_2022_29794_MOESM1_ESM.pdf [file 41467_2022_29794_MOESM1_ESM.pdf]

**Genomic and transcriptomic analysis of a library of small cell lung cancer patient-derived xenografts**

Caeser et al.

### Supplementary Table 1 Program versions used in RNA-seq analysis

| Program  | Version                   |
|----------|---------------------------|
| HTSEQ    | htseq/HTSeq-0.5.3         |
| PICARD   | picard/picard-tools-1.124 |
| R        | R/R-3.2.0                 |
| STAR     | star/STAR-STAR_2.5.0a     |
| SAMTOOLS | samtools/samtools-0.1.19  |

### Supplementary Table 2 Antibodies used for the immunohistochemical evaluation of PDX and clinical samples

| Antibody      | Clone       | Species    | Dilution | Manufacturer | Platform                   |
|---------------|-------------|------------|----------|--------------|----------------------------|
| ASCL1         | 24B72D11.11 | Mouse (m)  | 1:100    | BD           | Leica Bond-RX              |
| CD56          | MRQ42       | Rabbit (m) | 1:100    | Cell Marque  | Leica Bond-RX              |
| MYC           | Y69         | Rabbit (m) | 1:250    | Abcam        | Leica Bond-RX              |
| NEUROD1       | EPR 17084   | Rabbit (m) | 1:50     | Abcam        | Leica Bond-RX              |
| POU2F3        | 6D1         | Mouse (m)  | 1:600    | Santa Cruz   | Leica Bond-RX              |
| Synaptophysin | SNP88       | Mouse (m)  | 1:1000   | BioGenex     | Ventana Discovery<br>Ultra |
| YAP1          | 63.7        | Mouse (m)  | 1:2000   | Santa Cruz   | Leica Bond-RX              |

(m): monoclonal

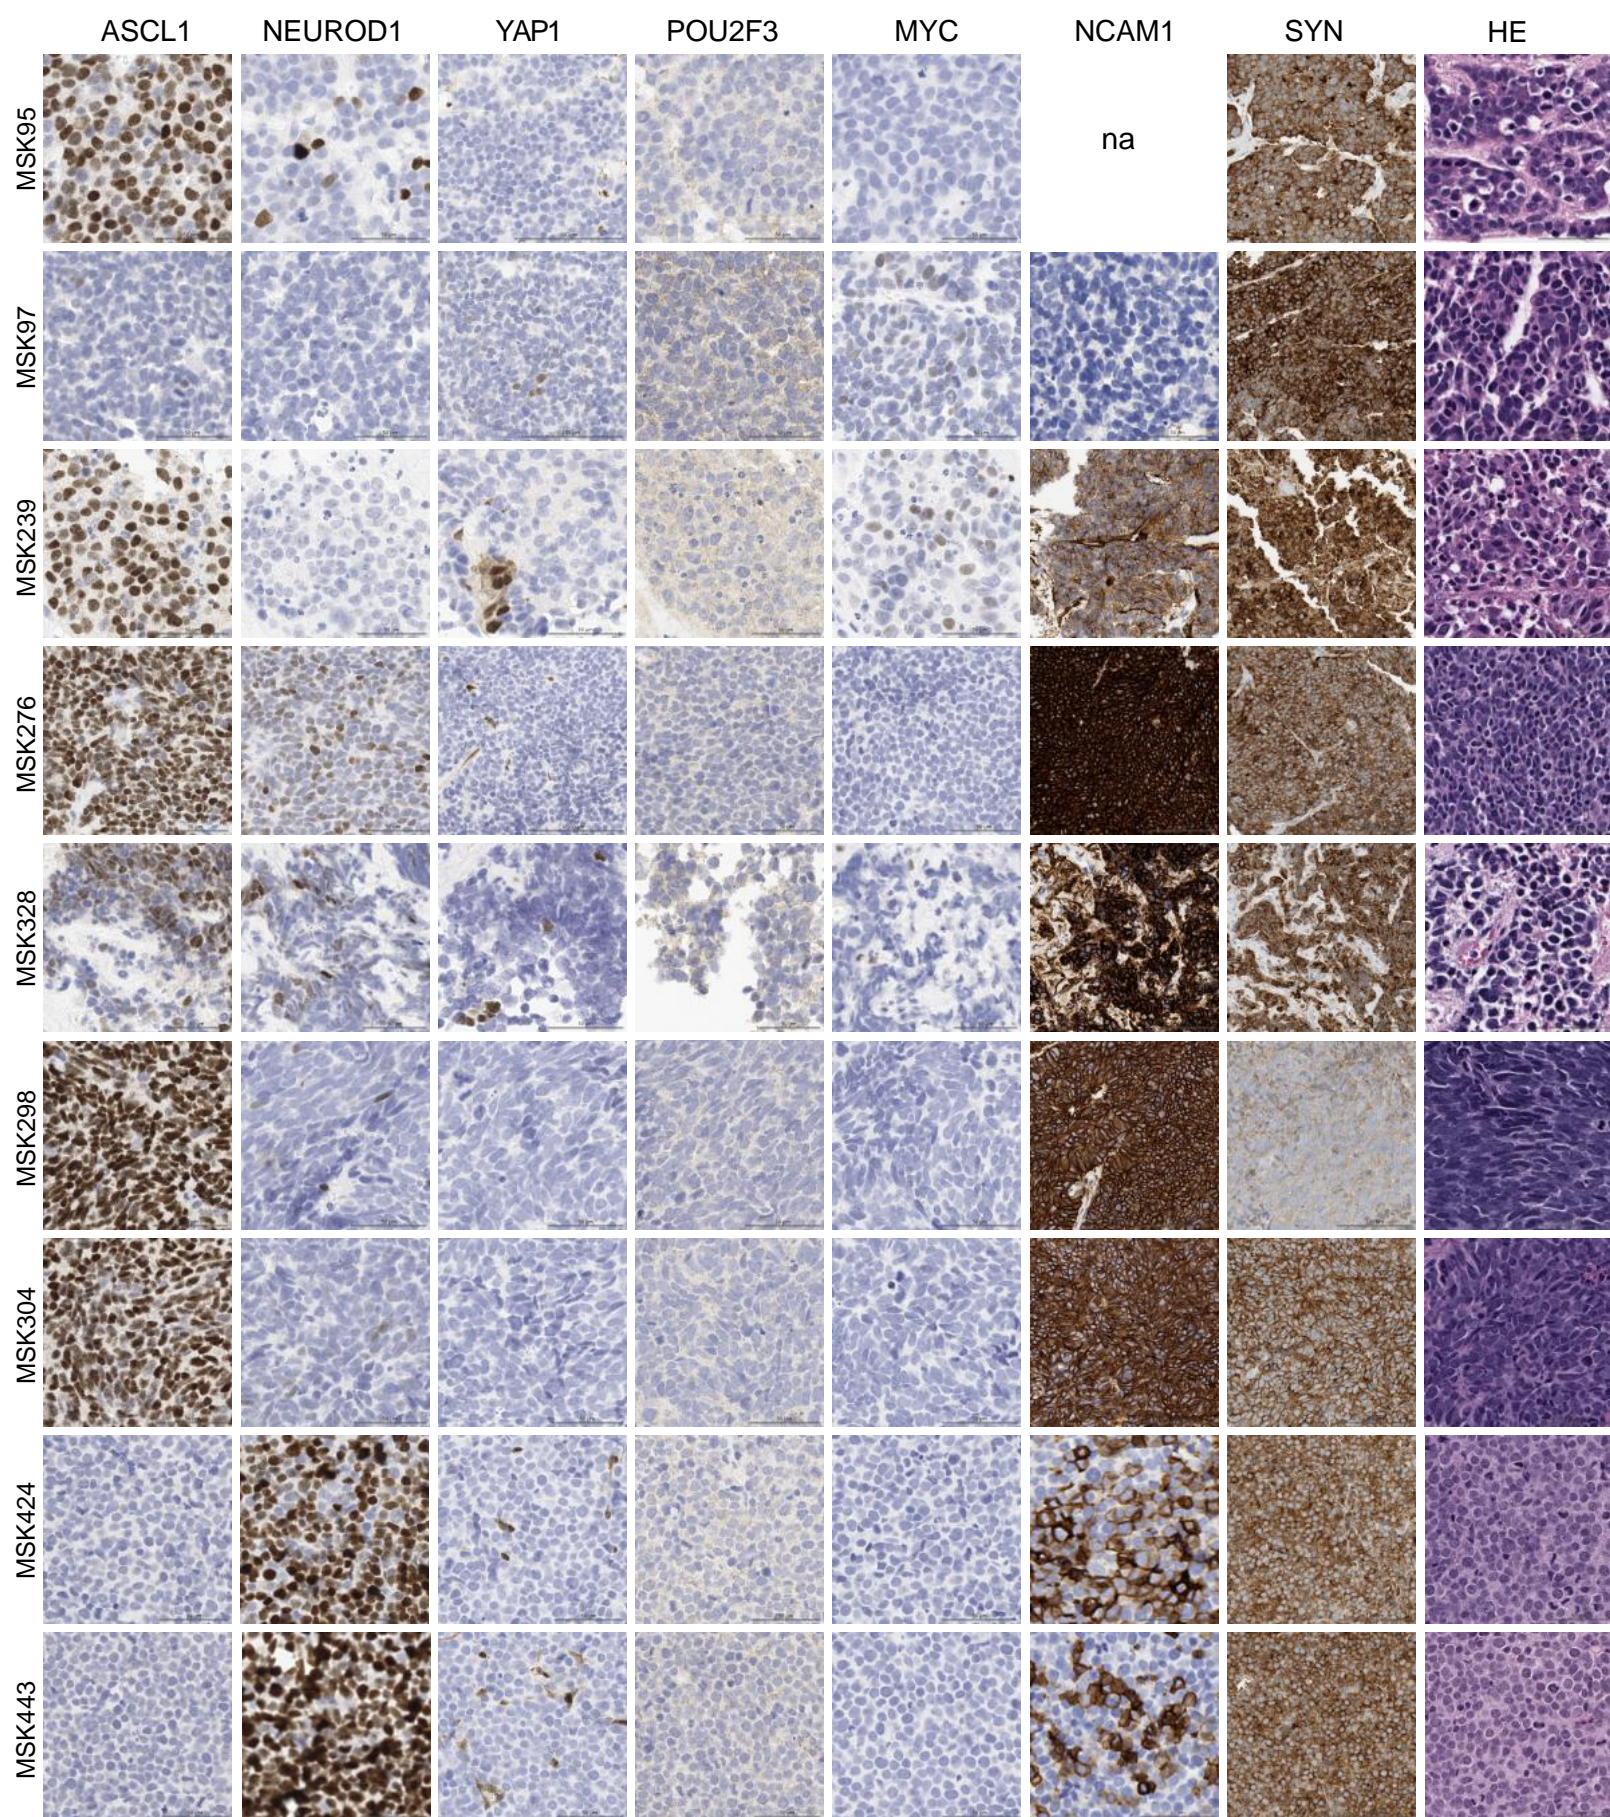

### Supplementary Figure 1 Histologic analysis of PDX/CDX samples

H&E and immunohistochemistry images for the indicated proteins are shown for the 37 patient-derived/circulating tumor cell-derived xenograft (PDX/CDX) samples (9 samples shown here). Three independent cores per sample were stained for H&E and the indicated protein with a representative example shown here. Scale bar as indicated, 50µM.

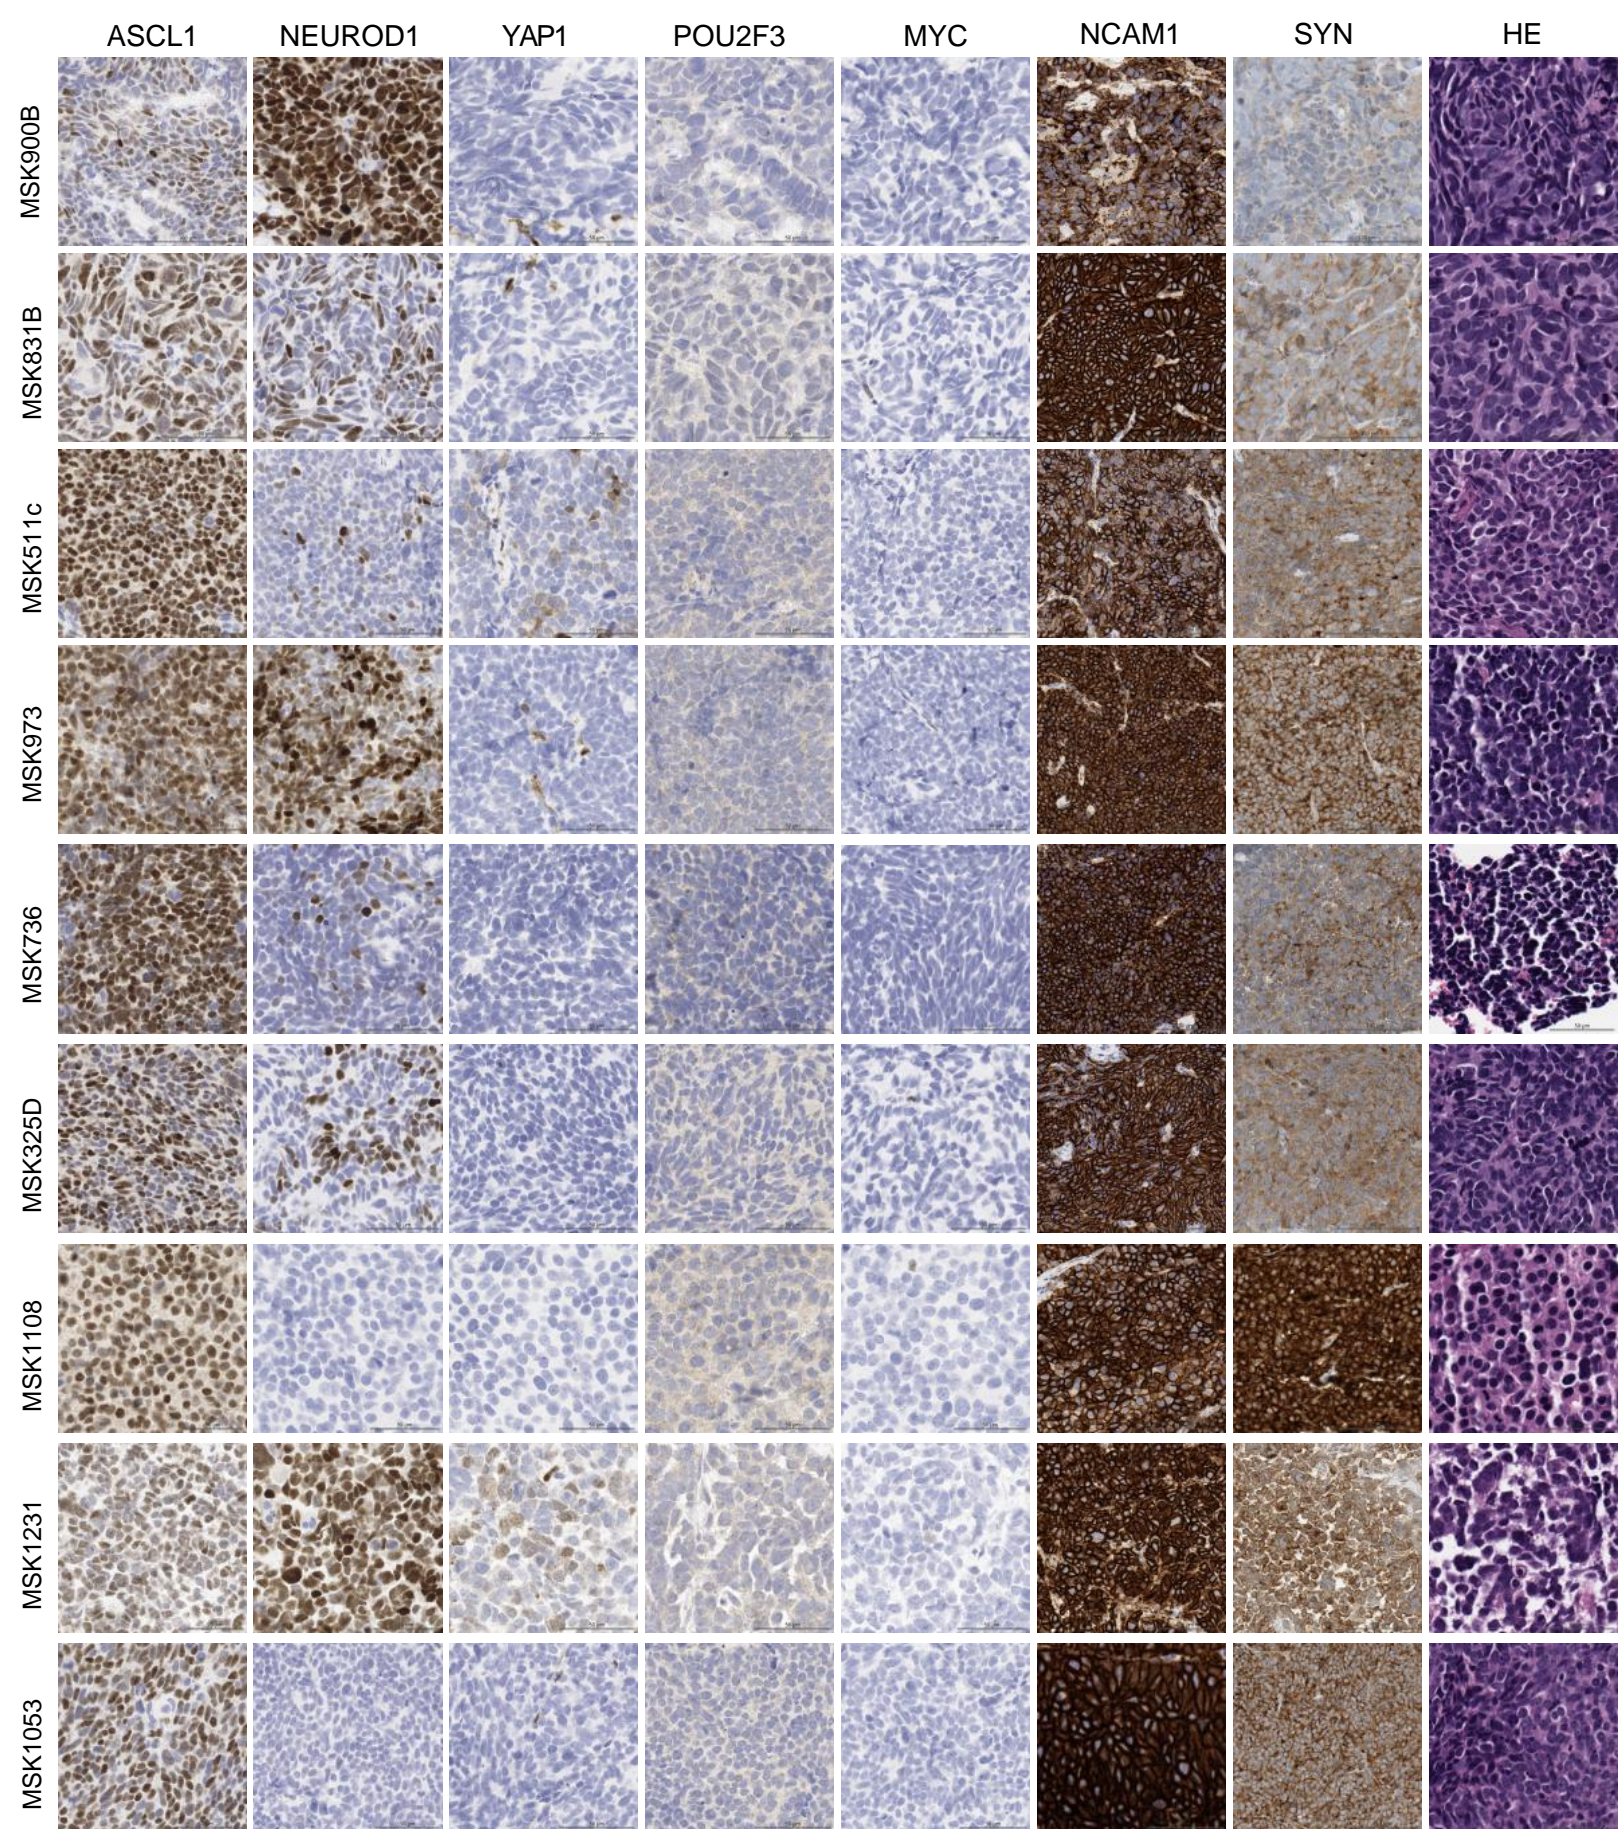

**Supplementary Figure 2 Histologic analysis of PDX/CDX samples**

H&E and immunohistochemistry images for the indicated proteins are shown for the 37 patient-derived/circulating tumor cell-derived xenograft (PDX/CDX) samples (9 samples shown here). Three independent cores per sample were stained for H&E and the indicated protein with a representative example shown here. Scale bar as indicated, 50µM.

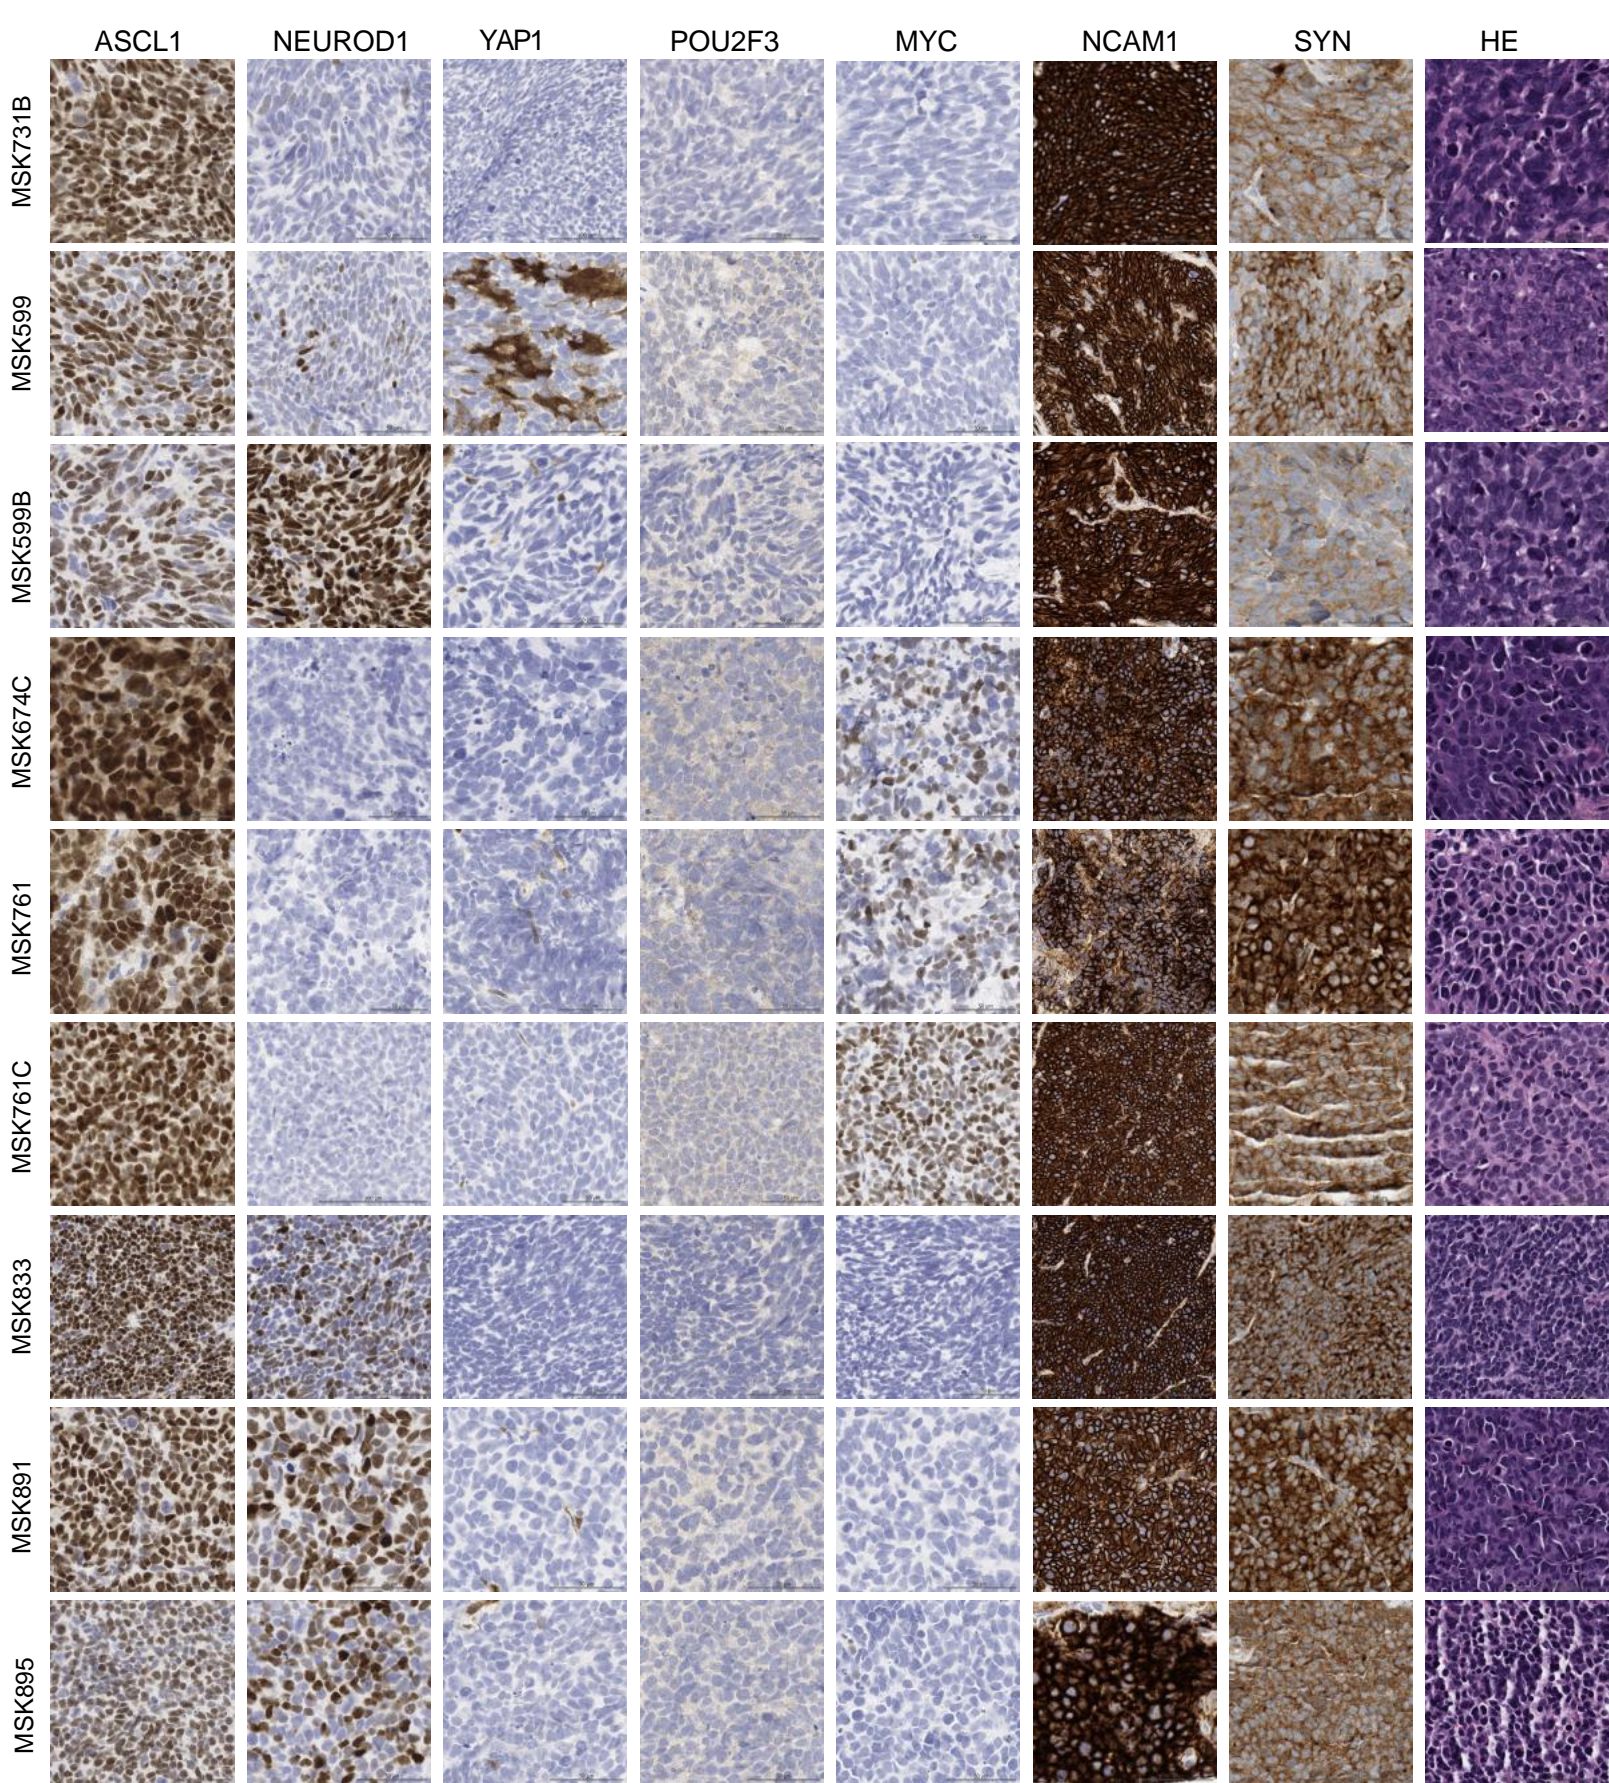

### Supplementary Figure 3 Histologic analysis of PDX/CDX samples

H&E and immunohistochemistry images for the indicated proteins are shown for the 37 patient-derived/circulating tumor cell-derived xenograft (PDX/CDX) samples (9 samples shown here). Three independent cores per sample were stained for H&E and the indicated protein with a representative example shown here. Scale bar as indicated, 50µM.

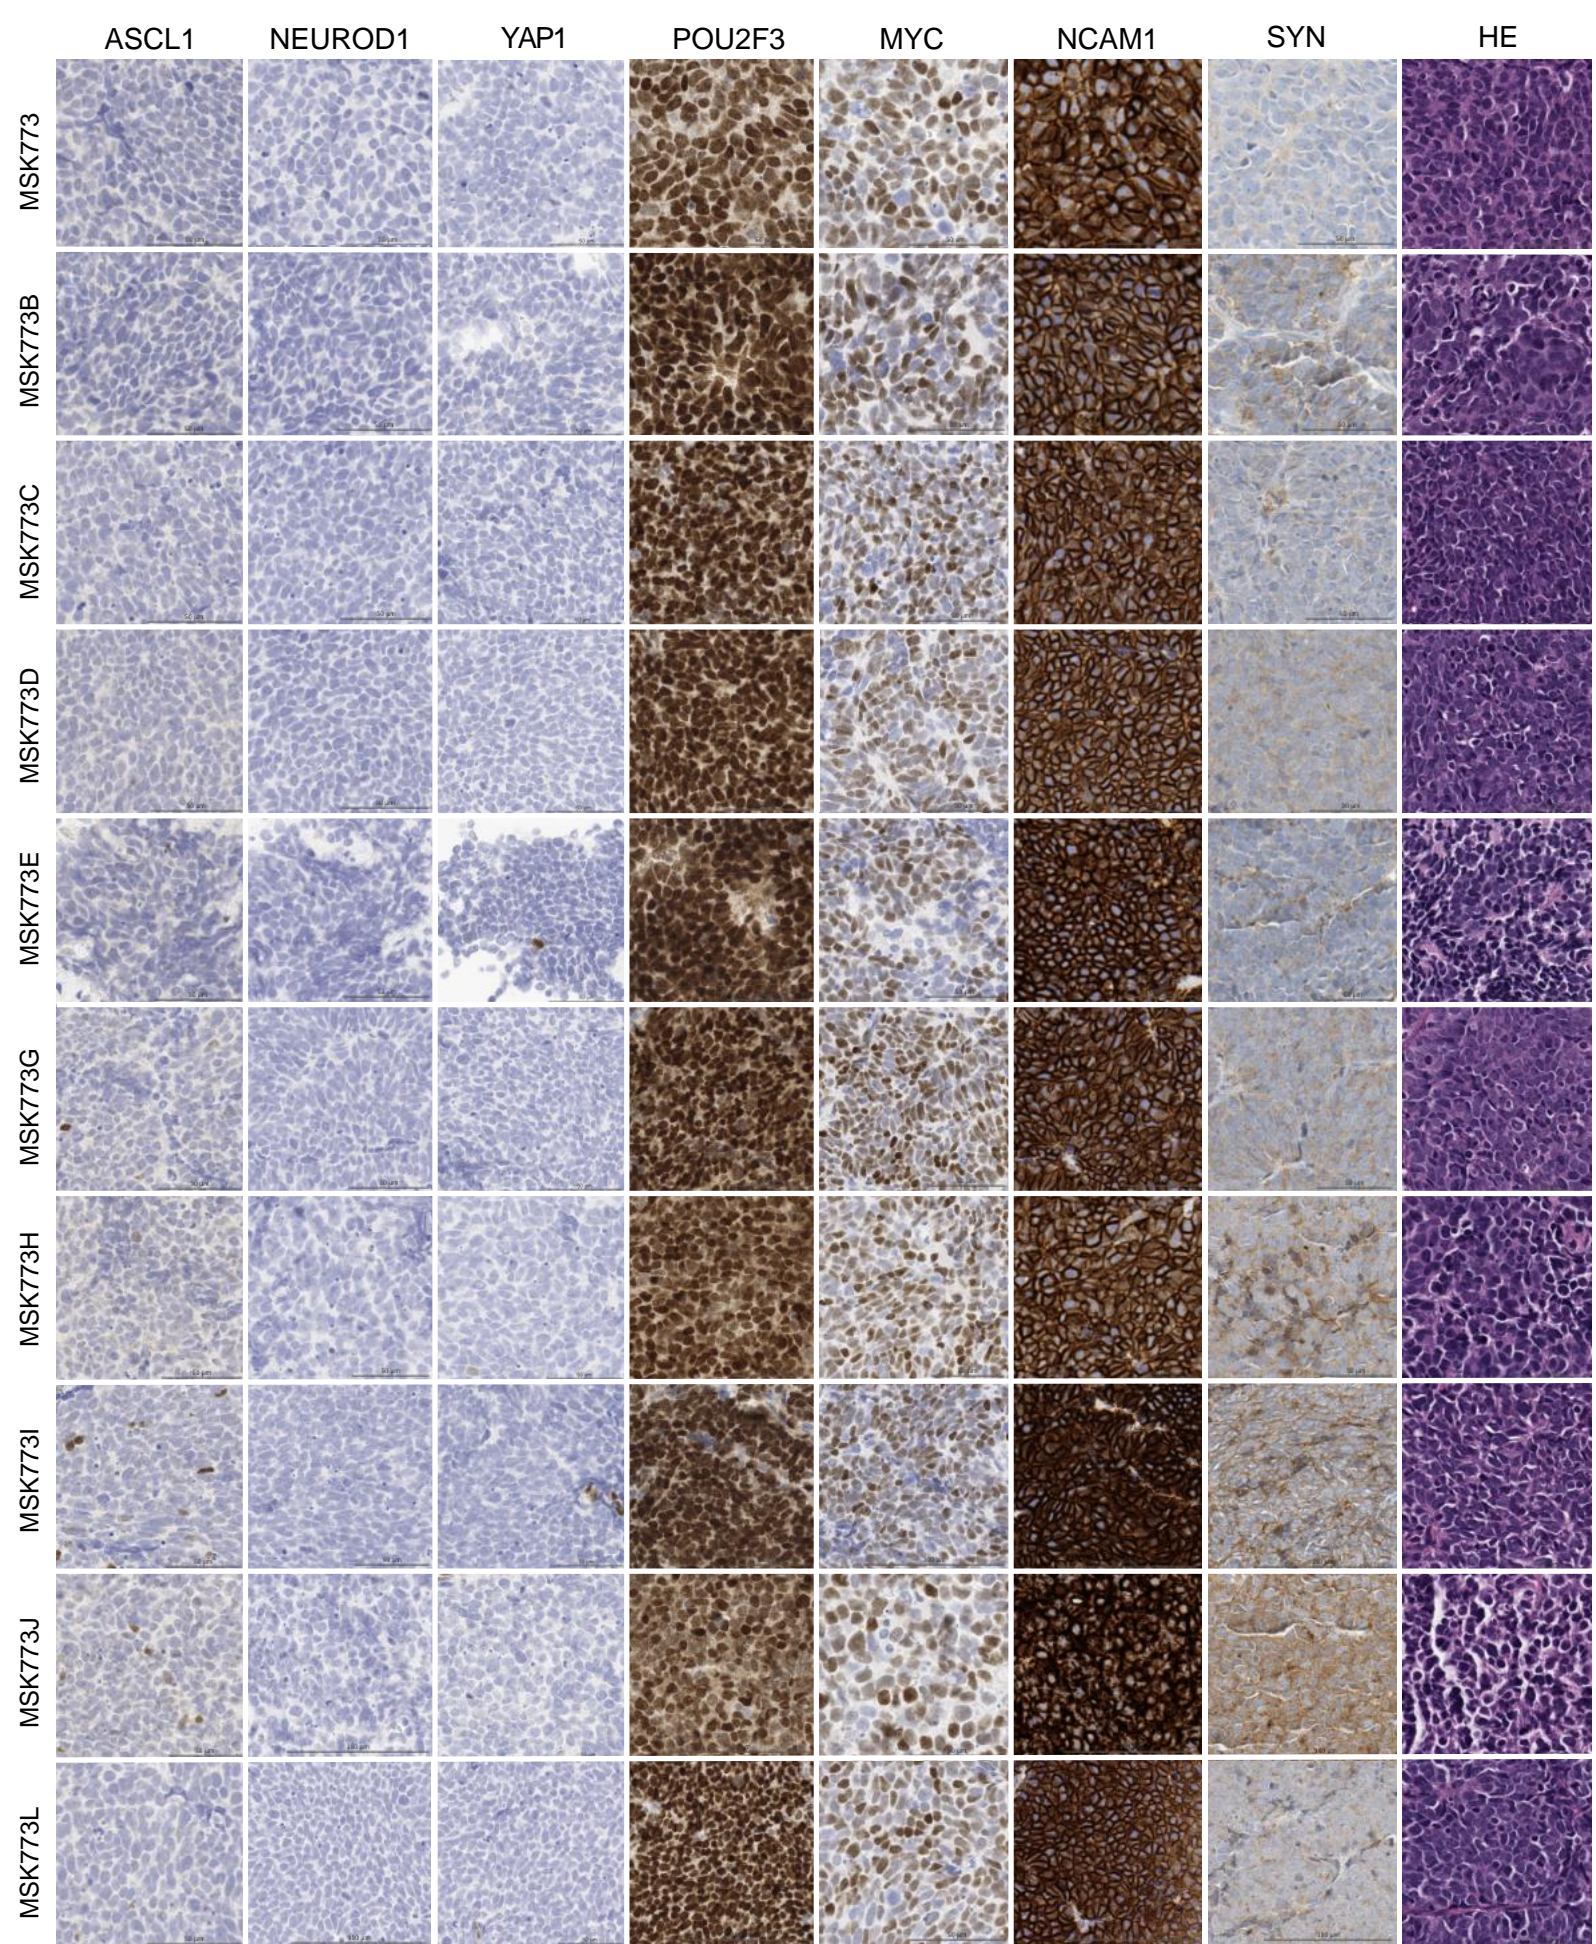

**Supplementary Figure 4 Histologic analysis of PDX/CDX samples**  
H&E and immunohistochemistry images for the indicated proteins are shown for the 37 patient-derived/circulating tumor cell-derived xenograft (PDX/CDX) samples (10 samples shown here). Three independent cores per sample were stained for H&E and the indicated protein with a representative example shown here. Scale bar as indicated, 50µM.

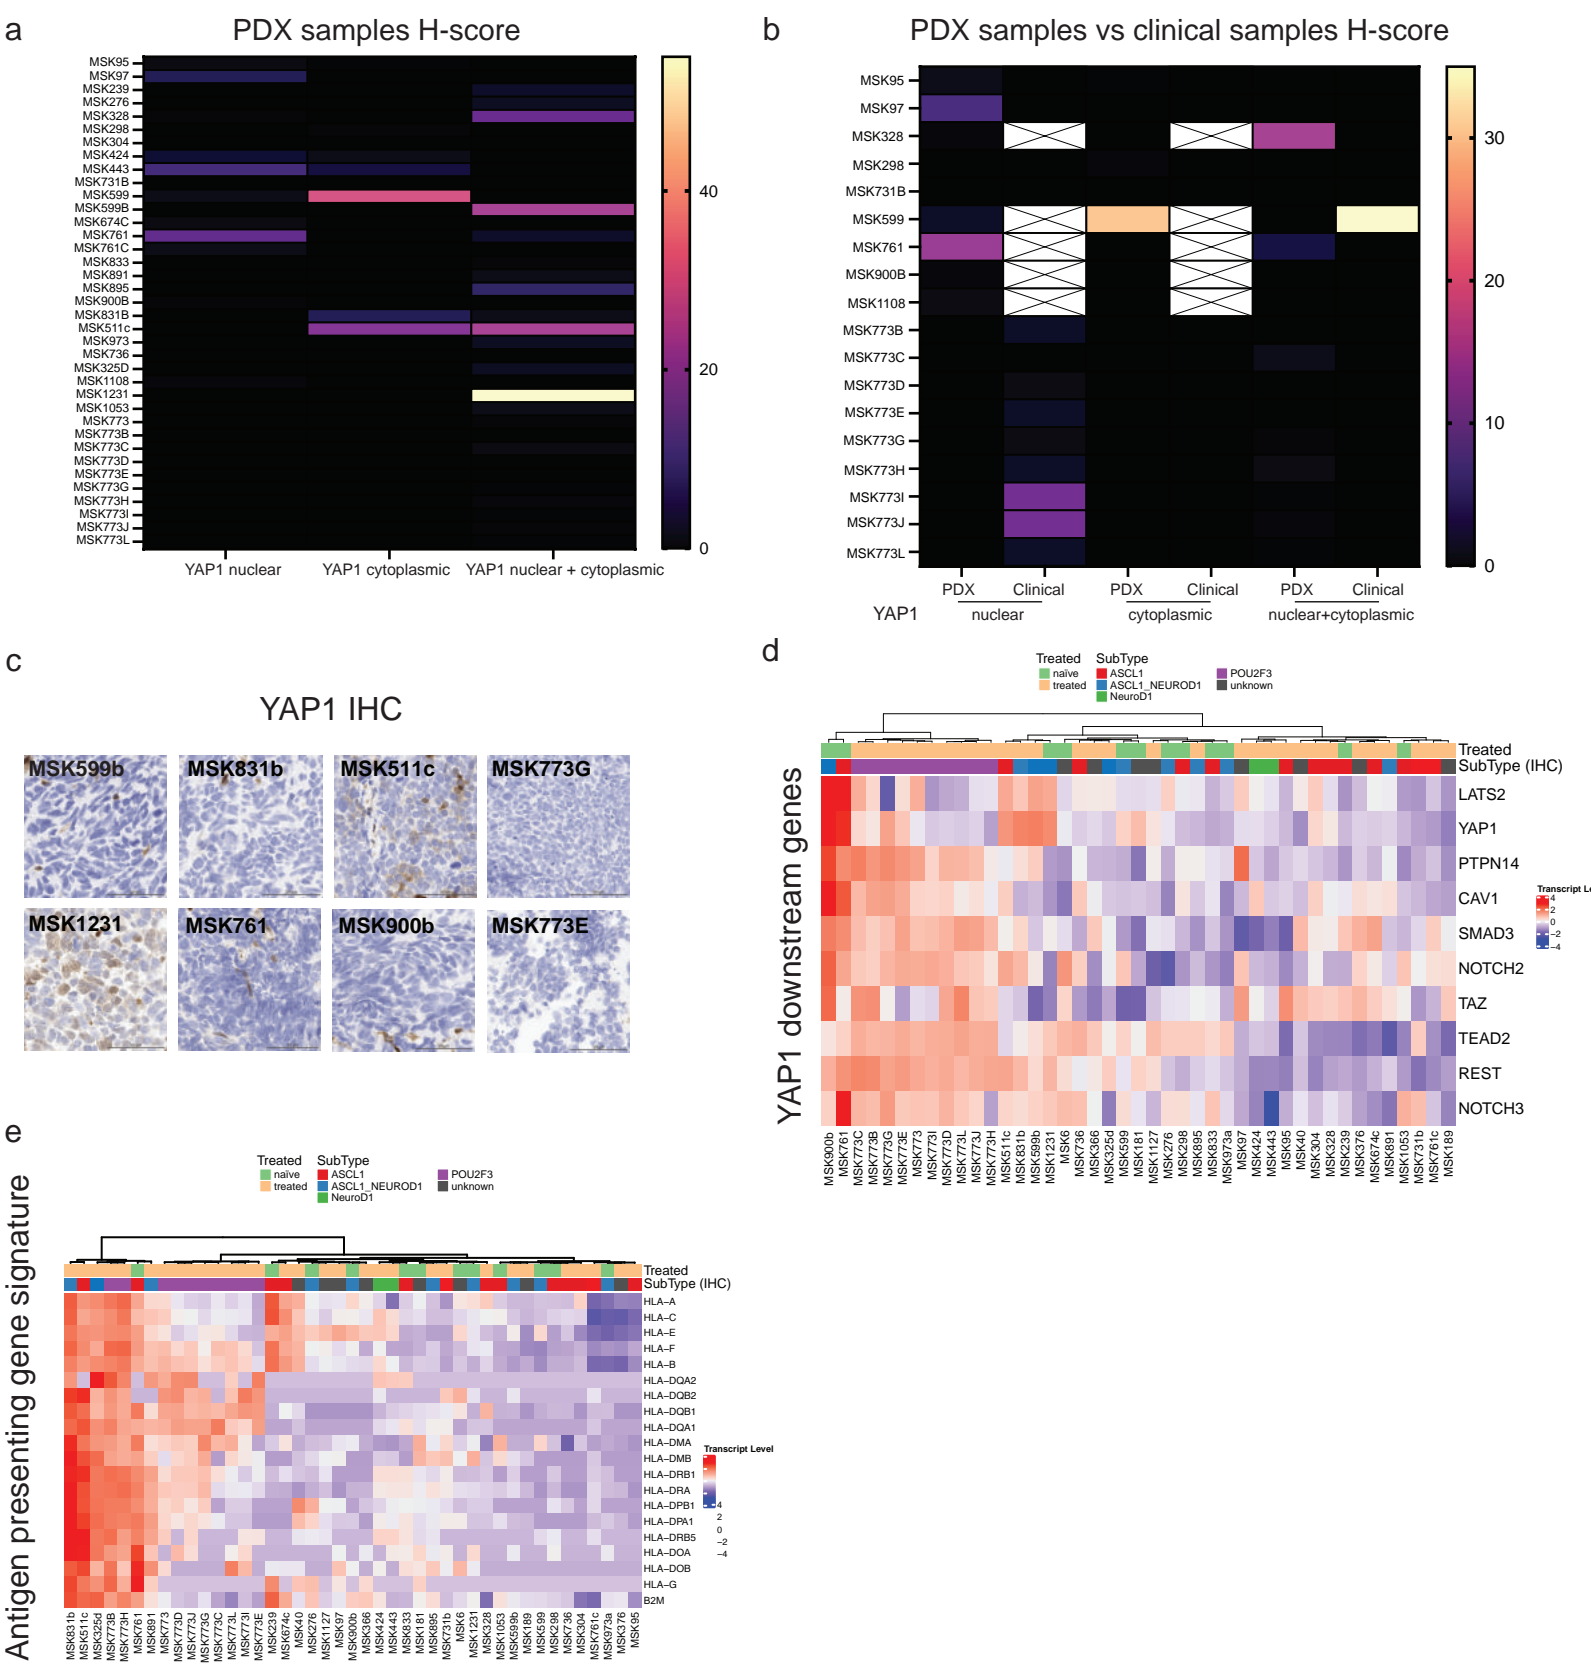

**Supplementary Figure 5 YAP1 expression in PDX/CDX and clinical samples**

**a** Heatmap depicts H-scores derived from 37 scored patient-derived xenograft (PDX) tumors for the fraction of positive cells and staining intensity, for YAP1 nuclear, cytoplasmic, and combined. Source data are provided as a Source Data file. **b** Heatmap depicts H-scores derived from 18 paired PDX tumors and clinical samples for the fraction of positive cells and staining intensity, for YAP1 nuclear, cytoplasmic and combined. White boxes with cross indicate scoring was not performed based on nuclear or cytoplasmic, only combined. Source data are provided as a Source Data file. **c** Immunohistochemistry images for YAP1 are shown for six selected PDX samples as indicated. Three independent cores per sample were stained for YAP1 with a representative example shown here. Scale bar as indicated, 50µm. **d** Heatmap of gene expression of 43 PDX samples for YAP1 downstream genes<sup>30</sup>. Color-coded panel on top depicts treatment status (naïve or treated) and subtype annotation based on IHC. Source data are provided as a Source Data file. **e** Heatmap of gene expression of 43 PDX samples for antigen presenting genes<sup>12</sup>. Color-coded panel on top depicts treatment status (naïve or treated) and subtype annotation based on IHC. Source data are provided as a Source Data file..

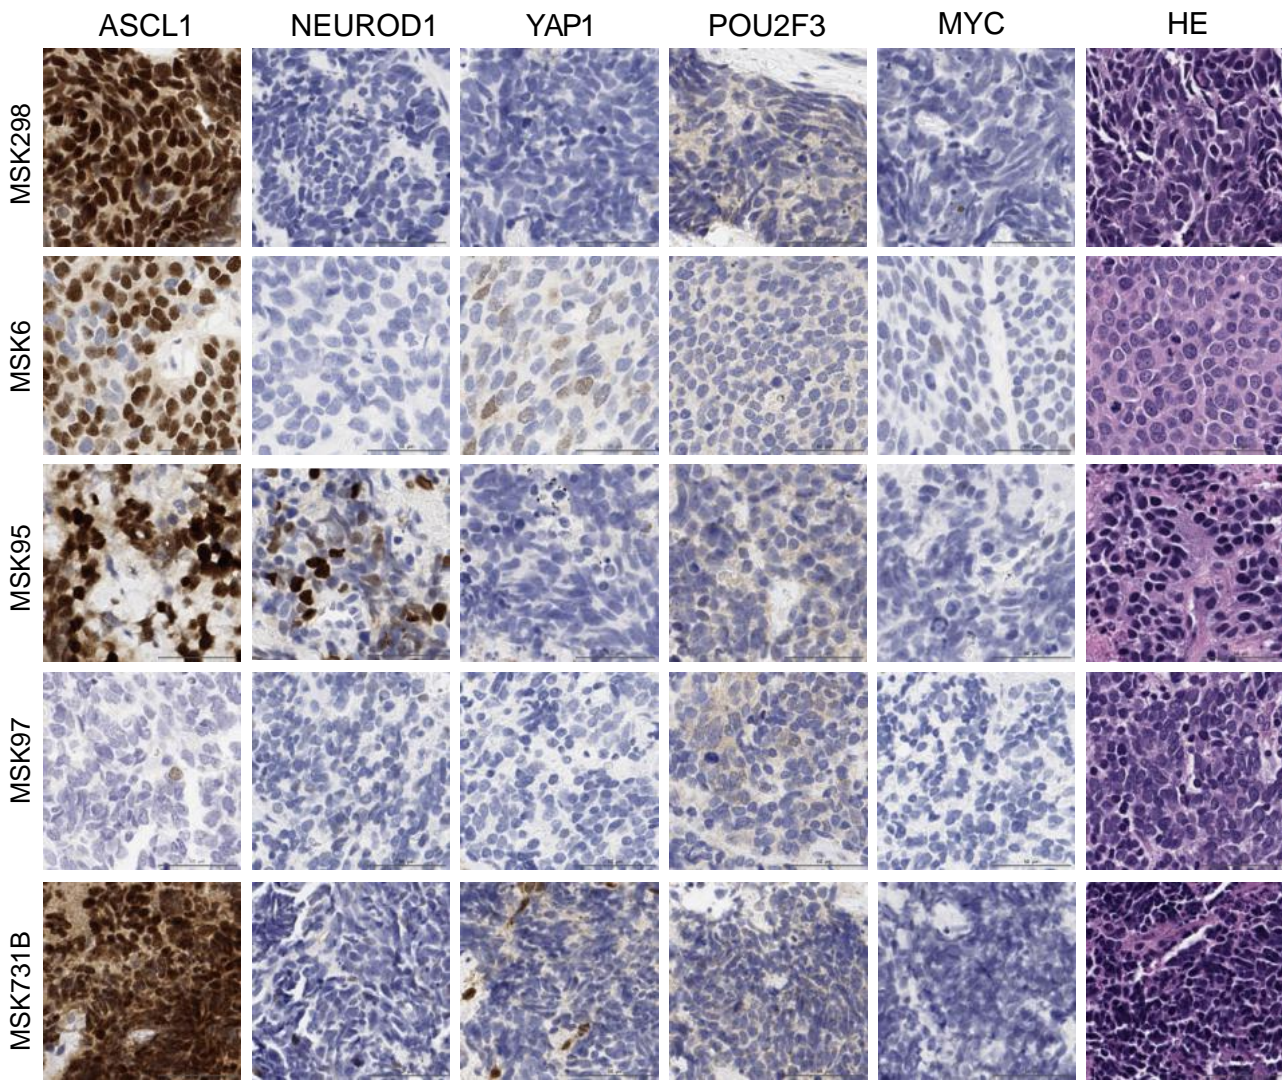

**Clinical Samples**

**Supplementary Figure 6 Histologic analysis of clinical samples**

H&E and immunohistochemistry images for the indicated proteins are shown for 14 clinical specimens (5 shown here). One core per sample was stained for H&E and the indicated protein with a representative example shown here. Scale bar as indicated, 50µM.



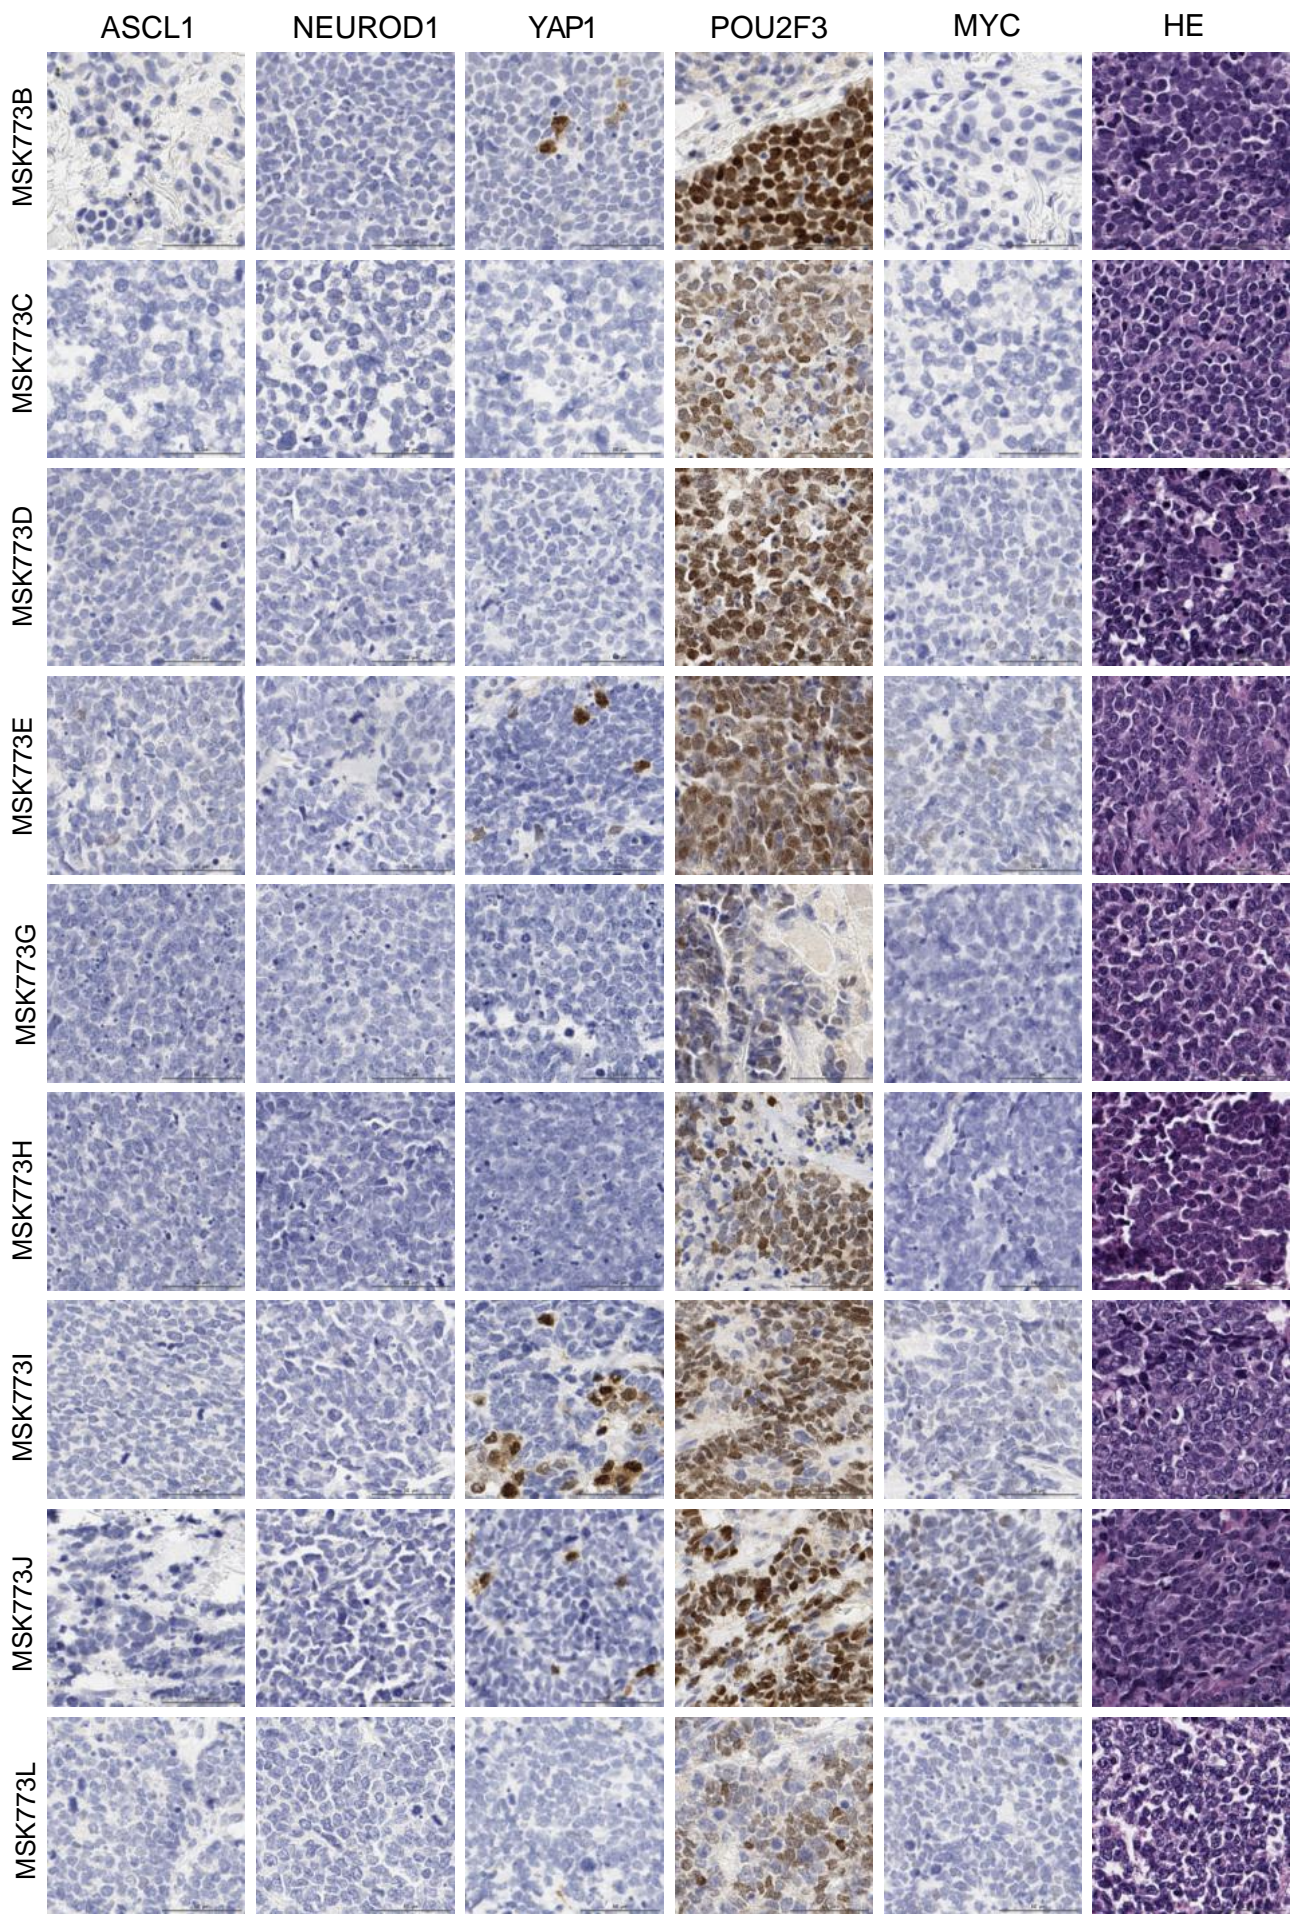

**Supplementary Figure 7 Histologic analysis of clinical samples**

H&E and immunohistochemistry images for the indicated proteins are shown for 14 clinical specimens (9 shown here). One core per sample was stained for H&E and the indicated protein with a representative example shown here. Scale bar as indicated, 50µM.

Treated SubType  
 naive ASCL1 POU2F3  
 treated ASCL1\_NEUROD1 unk  
 NeuroD1

EMT gene signature

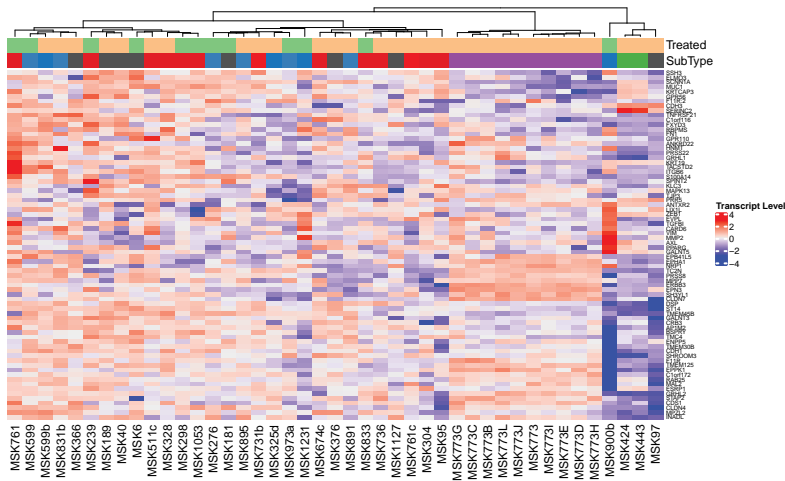

**Supplementary Figure 8 EMT gene signature of PDX samples**

Heatmap of gene expression of 43 patient-derived xenograft (PDX) samples for epithelial to mesenchymal transition (EMT) gene signature taken from 34. Color-coded panel on top depicts treatment status (naïve or treated) and subtype annotation based on IHC. Source data are provided as a Source Data file.
