# Supplementary material for: Genomic and transcriptomic analysis of a library of small cell lung cancer patient-derived xenografts
Source: PubMed Central journal article supplement (PMC9018685; doi:10.1038/s41467-022-29794-4), 2022-04-19
Supplement: 41467_2022_29794_MOESM2_ESM.pdf [file 41467_2022_29794_MOESM2_ESM.pdf]

## **Inventory of Supplementary Information**

Supplementary Table 1 Program versions used in RNA-seq analysis

Supplementary Table 2 Antibodies used for the immunohistochemical evaluation of PDX and clinical samples

Supplementary Figure 1-4 Histologic analysis of PDX/CDX samples

Supplementary Figure 5 YAP1 expression in PDX/CDX and clinical samples

Supplementary Figures 6-7 Histologic analysis of clinical samples

Supplementary Figure 8 EMT gene signature of PDX samples
